# Supplementary material for: Potential impact of carbonaceous aerosols on the Upper Troposphere and Lower Stratosphere (UTLS) during Asian summer monsoon in a global model simulation
Source: Copernicus journal article supplement (doi:10.5194/acp-2017-197), 2017-03-17
Supplement: Supplementary file [file acp-2017-197-AC1-supplement.zip]

# **Supplementary Figures:**

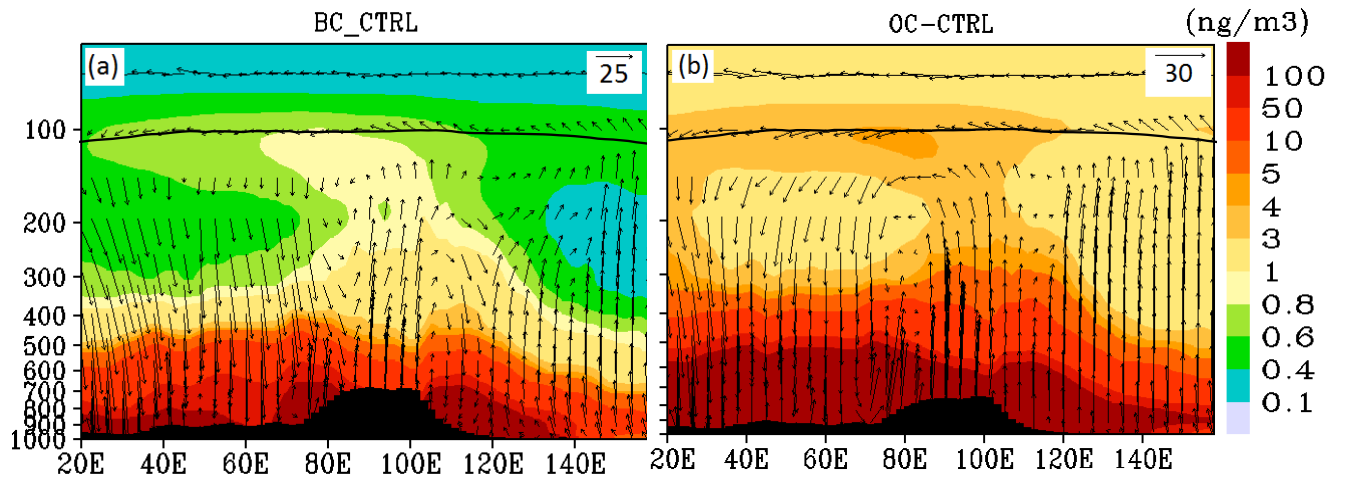

Figure S1: Longitude-pressure cross section (averaged for 15°N - 35°N and for the monsoon season) for (a) BC aerosols ( $\text{ng m}^{-3}$ ) (b) OC aerosols ( $\text{ng m}^{-3}$ ). Black arrows indicate wind vectors. The vertical velocity field has been scaled by 1000.

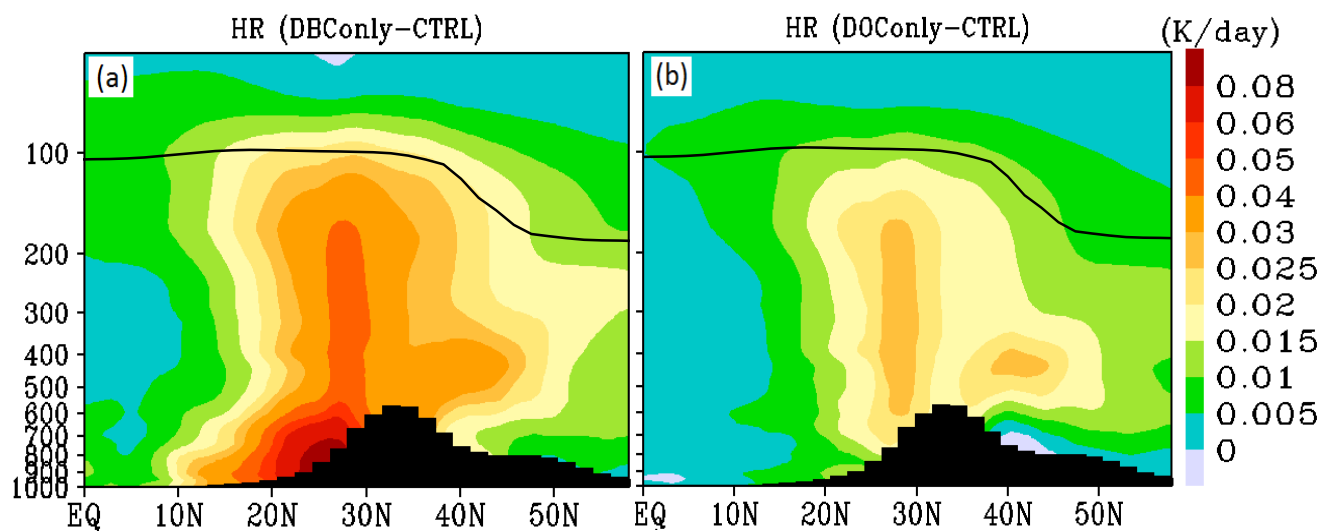

Figure S2: Latitude-pressure cross section of anomalies in heating rates ( $\text{K day}^{-1}$ ) averaged for  $80^\circ\text{E} - 110^\circ\text{E}$  and for the monsoon season for (a) BC aerosols (DBConly-CTRL) and (b) OC aerosols (DOConly-CTRL).

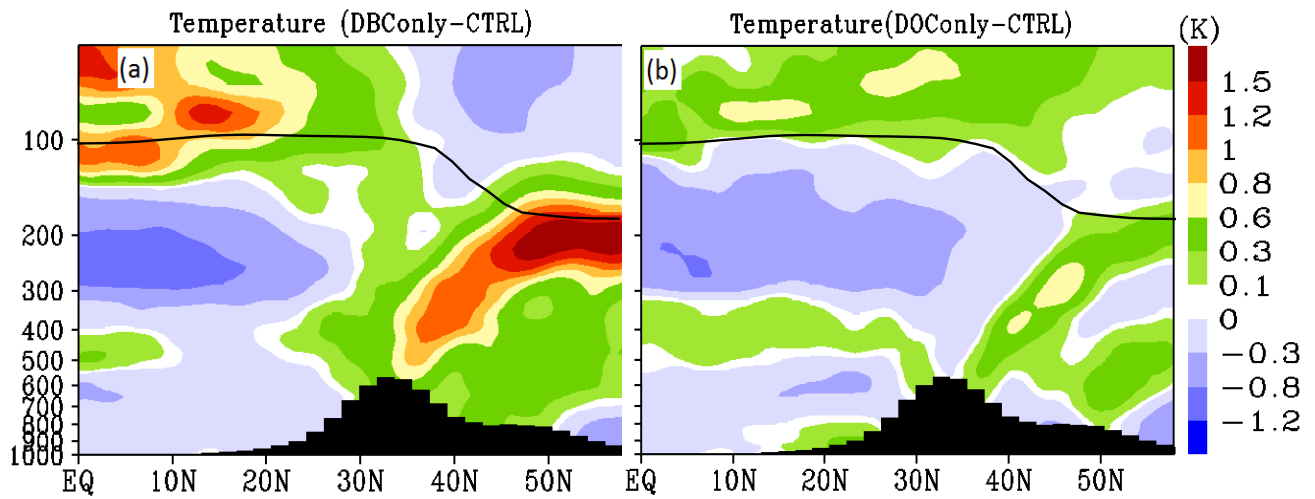

Figure S3: Latitude-pressure cross section of anomalies in temperature (K) averaged for 80°E - 110°E and for the monsoon season for (a) BC aerosols (DBConly-CTRL), (b) OC aerosols (DOConly-CTRL).

129  
130  
131  
132  
133  
134  
135

136

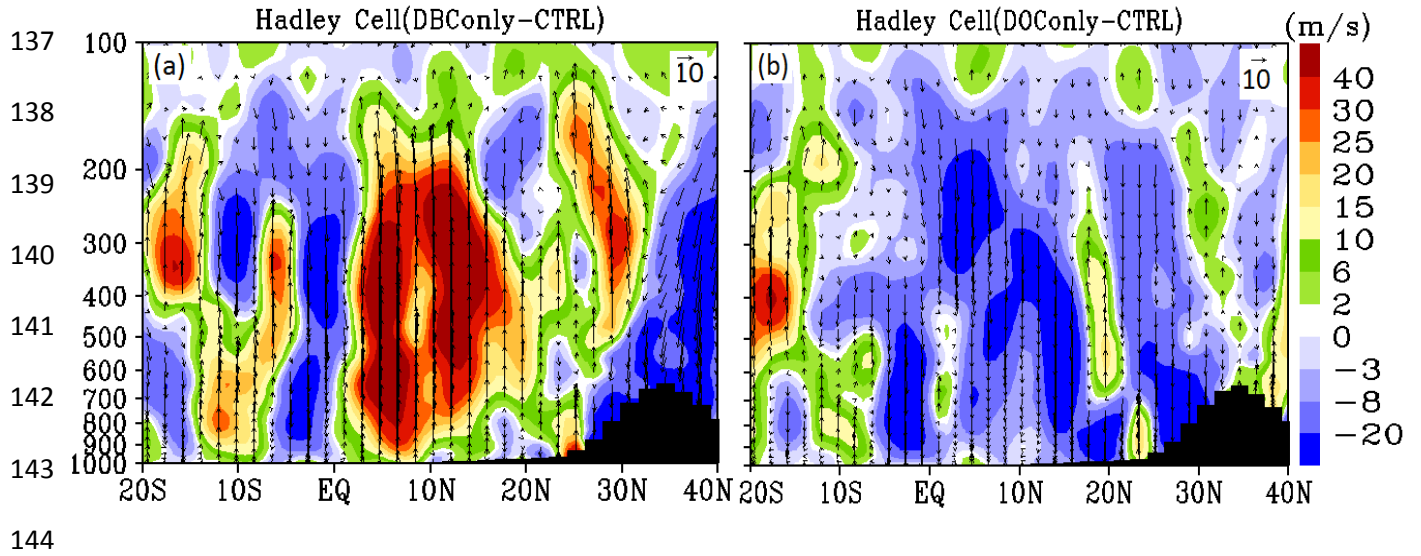

145 Figure S4: Difference in the meridional circulation ( $\text{m s}^{-1}$ ) averaged for  $70^\circ\text{E}$ - $90^\circ\text{E}$  and for the  
146 monsoon season for (a) BC aerosols (DBCOnly-CTRL) and (b) OC aerosols (DOCOnly-CTRL).

147  
148
