# Supplementary material for: Potential impact of carbonaceous aerosols on the Upper Troposphere and Lower Stratosphere (UTLS) during Asian summer monsoon in a global model simulation
Source: Copernicus journal article supplement (doi:10.5194/acp-2017-197), 2017-03-17
Supplement: Supplementary file [file acp-2017-197-AC1-supplement.zip]

---

**RE: ECHAM6-HAM model**

---

**From :** Schultz, Martin <m.schultz@fz-juelich.de>

Tue, May 16, 2017 05:43 PM

**Subject :** RE: ECHAM6-HAM model

**To :** S.Fadnavis <suvarna@tropmet.res.in>

Hello Suvarna,

should be activated. The relevant settings are:  
lcdnc\_progn = .true.  
ncd\_activ = 1  
(both in PHYSCTL)

However, I have no clue whether or not the indirect effect is working as expected or whether it is rather stronger or weaker than in other models. For this you will have to contact the group in Zürich.

Hope you are doing well,

Martin

-----Original Message-----

From: S.Fadnavis [mailto:suvarna@tropmet.res.in]

Sent: Tuesday, May 16, 2017 12:51 PM

To: Schultz, Martin

Subject: ECHAM6-HAM model

Hello Martin,

Hope things are fine there and I hope I am not bothering you in your busy schedule.

I am analyzing impact of BC and OC aerosols on Indian rainfall using ECHAM-HAM (echam6.1-ham2.1-moz0.8) where MOZ is not working (Switched off- the previous version).

We have used attached settings and namelist files. I wish to know in these model simulations whether aerosols are not considered to act as cloud condensation nuclei?

Whether the indirect forcing is neglected in these model simulations?

Best Regards,

Dr. Suvarna Fadnavis

Scientist - E

Indian Institute of Tropical Meteorology,

Pashan Road, Pune, India.

Editor,Earth Science Research (Canadian Center of Science and Education)  
Phone No: +91-20-2590-4200 (ext.1542)  
Fax: +91-020-25893825

-----  
-----  
-----  
-----  
Forschungszentrum Juelich GmbH  
52425 Juelich  
Sitz der Gesellschaft: Juelich  
Eingetragen im Handelsregister des Amtsgerichts Dueren Nr. HR B 3498  
Vorsitzender des Aufsichtsrats: MinDir Dr. Karl Eugen Huthmacher  
Geschaeftsfuehrung: Prof. Dr.-Ing. Wolfgang Marquardt (Vorsitzender),  
Karsten Beneke (stellv. Vorsitzender), Prof. Dr.-Ing. Harald Bolt,  
Prof. Dr. Sebastian M. Schmidt  
-----  
-----  
-----  
-----  
-----

---
