# Supplementary material for: Potential impact of carbonaceous aerosols on the Upper Troposphere and Lower Stratosphere (UTLS) during Asian summer monsoon in a global model simulation
Source: Copernicus journal article supplement (doi:10.5194/acp-2017-197), 2017-03-17
Supplement: Supplementary file [file acp-2017-197-AC1-supplement.zip]

---

**RE: AW: request for CARIBIC data**

---

**From :** Hang Su <hang.g.su@gmail.com>

Wed, Apr 19, 2017 01:46 AM

**Subject :** RE: AW: request for CARIBIC data

**To :** 'S.Fadnavis' <suvarna@tropmet.res.in>, 'Andreas Zahn' <andreas.zahn@kit.edu>

**Cc :** Ditas, Jeannine <j.ditas@mpic.de>, 'Gayatry Kalita' <gayatry.kalita@tropmet.res.in>

Dear Fadnavis

Thank you very for your interest. But so far we have no flight over the requested area in India. On the other hand we are not ready to release the data at the moment. We are expecting to make the first release in November or December.

Sorry that we may not be able to support you for your current project.

Best regards

Hang

-----Original Message-----

From: S.Fadnavis [mailto:suvarna@tropmet.res.in]

Sent: 2017年4月18日 18:23

To: Andreas Zahn

Cc: Jeannine Ditas (j.ditas@mpic.de); Hang Su (hang.g.su@gmail.com); Gayatry Kalita

Subject: Re: AW: request for CARIBIC data

Dear Dr. Andreas,

Thank you for your email and willingness to provide CARIBIC data. We will need BC profiles during the monsoon (June-September) season and over the Asian region (20-120E, 15-40N). Few profiles (or single profile) for any year will be helpful. We will compare mean profile obtained from the model simulation with CARIBIC profile.

Please find attached a scanned copy of signed data protocol. I will be happy to provide other details if required.

Best Regards,  
Dr. Suvarna Fadnavis  
Scientist - E  
Indian Institute of Tropical Meteorology, Pashan Road, Pune, India.  
Phone No: +91-20-2590-4200 (ext.1542)  
Fax: +91-020-25893825

----- Original Message -----

From: "Andreas Zahn" <andreas.zahn@kit.edu>  
To: "S.Fadnavis" <suvarna@tropmet.res.in>  
Cc: "Jeannine Ditas (j.ditas@mpic.de)" <j.ditas@mpic.de>, "Hang Su (hang.g.su@gmail.com)" <hang.g.su@gmail.com>  
Sent: Thursday, April 13, 2017 5:27:56 PM  
Subject: AW: request for CARIBIC data

Dear Suvarna,

thanks for your interest in the CARIBIC data. I rushed over your paper; it's actually a nice one.

Our SP2 instrument was only installed in summer 2014. Since then, we did not have many flights, also due to an accident in March 2016 and an extensive instrument modification thereafter.

In the cc there are the two PIs for the SP2, who finally decide on the data provision. Jeannine and hang, can you please answer Suvarna.

Attached is also the data protocol that should be signed.

Thanks and best wishes

Andreas

Dear Dr. Andreas,

I am a scientist working in Indian Institute of Tropical Meteorology, Pune. Recently, we (Gayatry Kalita, Ravi Kumar, Blaz Gasparini, and Jui-Lin Frank Li) have written a manuscript "Potential impact

of carbonaceous aerosols on the Upper Troposphere and Lower Stratosphere (UTLS) during Asian summer monsoon in a global model simulation".

This manuscript is open for discussion in ACPD. We have received comments from one reviewer. In general, comments are helpful and the reviewer seems to be positive. He has suggested comparing BC vertical profile with measurements (CARIBIC or SP2 Japan).

We have performed sensitivity simulations for 20 years and shown the impact of carbonaceous aerosol on the monsoon circulation. The manuscript is available at <http://www.atmos-chem-phys-discuss.net/acp-2017-197/> >

Hope you find it interesting. Our study is based on ECHAM6\_HAM simulations using AEROCOM emission inventory for 20 years of simulations. We wish to compare vertical profiles of BC over the Asian summer monsoon region (60-120E; 10-45N) with BC measurements obtained from CARIBIC project. Since model represents a mean state, a profile of BC during the monsoon season (June-September) will be helpful.

We will be grateful to you if you contribute in CARIBIC data analysis as a co-author. I look forward to your response.

Best Regards,

Dr. Suvarna Fadnavis

Scientist - E

Indian Institute of Tropical Meteorology, Pashan Road, Pune, India.

Editor, Earth Science Research (Canadian Center of Science and Education) Phone No: +91-20-2590-4200 (ext.1542)

Fax: +91-020-25893825

---
